# Supplementary material
Source: PubMed Central journal article supplement (PMC3575913)
Supplement: pro0021-1824-SD1.pdf [file pro0021-1824-SD1.pdf]

**Smooth statistical torsion angle potential derived from a large  
conformational database via adaptive kernel density estimation  
improves the quality of NMR protein structures**

Guillermo A. Bermejo, G. Marius Clore, and Charles D. Schwieters

**Supporting Information**

**Table SI.** Probability Density Expressions Extracted from the Torsion Angle Database

| <b>Residue Type</b>   | <b>Residues in Database <sup>a</sup></b>                                 | <b>Probability Density Function <sup>b</sup></b> | <b>Statistical Approximation <sup>c</sup></b> | <b>Energy Term Applied To: <sup>d</sup></b> |
|-----------------------|--------------------------------------------------------------------------|--------------------------------------------------|-----------------------------------------------|---------------------------------------------|
| Gly                   | All glycines (93,113)                                                    | $p(\phi, \psi)$                                  | None                                          | All glycines                                |
| cis-Pro               | All cis-prolines (2,343)                                                 | $p(\phi, \psi, \chi_2)$                          | $\chi_2$ determines other ring torsion angles | All cis-prolines                            |
| trans-Pro             | All trans-prolines (46,686)                                              | $p(\phi, \psi, \chi_2)$                          | $\chi_2$ determines other ring torsion angles | All trans-prolines                          |
| prePro <sub>Ala</sub> | All non-glycine, non-proline, pre-proline residues (39,093)              | $p(\phi, \psi)$                                  | None                                          | pre-proline alanines                        |
| prePro <sub>Thr</sub> | All non-glycine, non-proline, non-alanine, pre-proline residues (35,471) | $p(\phi, \psi, \chi_1)$                          | None                                          | pre-proline threonines                      |
| prePro <sub>Val</sub> | All non-glycine, non-proline, non-alanine, pre-proline residues (35,471) | $p(\phi, \psi, \chi_1)$                          | None                                          | pre-proline valines                         |
| prePro <sub>Ser</sub> | All non-glycine, non-proline, non-alanine, pre-proline residues (35,471) | $p(\phi, \psi, \chi_1)$                          | None                                          | pre-proline serines                         |
| prePro <sub>Cys</sub> | All non-glycine, non-proline, non-alanine, pre-proline residues (35,471) | $p(\phi, \psi, \chi_1)$                          | None                                          | pre-proline cysteines                       |
| prePro <sub>Asp</sub> | All non-glycine, non-proline, non-alanine, pre-proline residues (35,471) | $p(\phi, \psi, \chi_1) \times$                   | $\chi_2 \perp \phi, \psi, \chi_1$             | pre-proline aspartates                      |
|                       | All aspartates (57,985)                                                  | $p(\chi_2)$                                      |                                               |                                             |
| prePro <sub>Asn</sub> | All non-glycine, non-proline, non-alanine, pre-proline residues (35,471) | $p(\phi, \psi, \chi_1) \times$                   | $\chi_2 \perp \phi, \psi, \chi_1$             | pre-proline asparagines                     |
|                       | All asparagines (44,158)                                                 | $p(\chi_2)$                                      |                                               |                                             |
| prePro <sub>Ile</sub> | All non-glycine, non-proline, non-alanine, pre-proline residues (35,471) | $p(\phi, \psi, \chi_1) \times$                   | $\chi_2 \perp \phi, \psi, \chi_1$             | pre-proline isoleucines                     |
|                       | All isoleucines (59,385)                                                 | $p(\chi_2)$                                      |                                               |                                             |
| prePro <sub>Leu</sub> | All non-glycine, non-proline, non-alanine, pre-proline residues (35,471) | $p(\phi, \psi, \chi_1) \times$                   | $\chi_2 \perp \phi, \psi, \chi_1$             | pre-proline leucines                        |
|                       | All leucines (95,250)                                                    | $p(\chi_2)$                                      |                                               |                                             |
| prePro <sub>His</sub> | All non-glycine, non-proline, non-alanine, pre-proline residues (35,471) | $p(\phi, \psi, \chi_1) \times$                   | $\chi_2 \perp \phi, \psi, \chi_1$             | pre-proline histidines                      |
|                       | All histidines (24,061)                                                  | $p(\chi_2)$                                      |                                               |                                             |

**Table SI. (Continued.)**

| Residue Type          | Residues in Database <sup>a</sup>                                                                           | Probability Density Function <sup>b</sup>                         | Statistical Approximation <sup>c</sup>            | Energy Term Applied To: <sup>d</sup> |
|-----------------------|-------------------------------------------------------------------------------------------------------------|-------------------------------------------------------------------|---------------------------------------------------|--------------------------------------|
| prePro <sub>Tyr</sub> | All non-glycine, non-proline, non-alanine, pre-proline residues (35,471)<br><br>All tryptophans (15,671)    | $p(\phi, \psi, \chi_1) \times$<br><br>$p(\chi_2)$                 | $\chi_2 \perp \phi, \psi, \chi_1$                 | pre-proline tryptophans              |
| prePro <sub>Tyr</sub> | All non-glycine, non-proline, non-alanine, pre-proline residues (35,471)<br><br>All tyrosines (38,484)      | $p(\phi, \psi, \chi_1) \times$<br><br>$p(\chi_2)$                 | $\chi_2 \perp \phi, \psi, \chi_1$                 | pre-proline tyrosines                |
| prePro <sub>Phe</sub> | All non-glycine, non-proline, non-alanine, pre-proline residues (35,471)<br><br>All phenylalanines (45,572) | $p(\phi, \psi, \chi_1) \times$<br><br>$p(\chi_2)$                 | $\chi_2 \perp \phi, \psi, \chi_1$                 | pre-proline phenylalanines           |
| prePro <sub>Met</sub> | All non-glycine, non-proline, non-alanine, pre-proline residues (35,471)<br><br>All methionines (14,319)    | $p(\phi, \psi, \chi_1) \times$<br><br>$p(\chi_2, \chi_3)$         | $\chi_2, \chi_3 \perp \phi, \psi, \chi_1$         | pre-proline methionines              |
| prePro <sub>Glu</sub> | All non-glycine, non-proline, non-alanine, pre-proline residues (35,471)<br><br>All glutamates (46,950)     | $p(\phi, \psi, \chi_1) \times$<br><br>$p(\chi_2, \chi_3)$         | $\chi_2, \chi_3 \perp \phi, \psi, \chi_1$         | pre-proline glutamates               |
| prePro <sub>Gln</sub> | All non-glycine, non-proline, non-alanine, pre-proline residues (35,471)<br><br>All glutamines (31,349)     | $p(\phi, \psi, \chi_1) \times$<br><br>$p(\chi_2, \chi_3)$         | $\chi_2, \chi_3 \perp \phi, \psi, \chi_1$         | pre-proline glutamines               |
| prePro <sub>Arg</sub> | All non-glycine, non-proline, non-alanine, pre-proline residues (35,471)<br><br>All arginines (38,701)      | $p(\phi, \psi, \chi_1) \times$<br><br>$p(\chi_2, \chi_3, \chi_4)$ | $\chi_2, \chi_3, \chi_4 \perp \phi, \psi, \chi_1$ | pre-proline arginines                |
| prePro <sub>Lys</sub> | All non-glycine, non-proline, non-alanine, pre-proline residues (35,471)<br><br>All lysines (36,834)        | $p(\phi, \psi, \chi_1) \times$<br><br>$p(\chi_2, \chi_3, \chi_4)$ | $\chi_2, \chi_3, \chi_4 \perp \phi, \psi, \chi_1$ | pre-proline lysines                  |

**Table SI. (Continued.)**

| Residue Type | Residues in Database <sup>a</sup>           | Probability Density Function <sup>b</sup>                                                                    | Statistical Approximation <sup>c</sup>                                                                                                           | Energy Term Applied To: <sup>d</sup> |
|--------------|---------------------------------------------|--------------------------------------------------------------------------------------------------------------|--------------------------------------------------------------------------------------------------------------------------------------------------|--------------------------------------|
| Ala          | All non-pre-proline alanines (98,680)       | $p(\phi, \psi)$                                                                                              | None                                                                                                                                             | non-pre-proline alanines             |
| Thr          | All non-pre-proline threonines (58,953)     | $p(\phi, \psi, \chi_1)$                                                                                      | None                                                                                                                                             | non-pre-proline threonines           |
| Val          | All non-pre-proline valines (75,992)        | $p(\phi, \psi, \chi_1)$                                                                                      | None                                                                                                                                             | non-pre-proline valines              |
| Ser          | All non-pre-proline serines (58,156)        | $p(\phi, \psi, \chi_1)$                                                                                      | None                                                                                                                                             | non-pre-proline serines              |
| Cys          | All non-pre-proline cysteines (9,577)       | $p(\phi, \psi, \chi_1)$                                                                                      | None                                                                                                                                             | non-pre-proline cysteines            |
| Asp          | All non-pre-proline aspartates (54,955)     | $\frac{p(\phi, \psi, \chi_1)P(\chi_1, \chi_2)}{p(\chi_1)}$                                                   | $\chi_2 \perp \phi, \psi$ given $\chi_1$                                                                                                         | non-pre-proline aspartates           |
| Asn          | All non-pre-proline asparagines (41,623)    | $\frac{p(\phi, \psi, \chi_1)P(\chi_1, \chi_2)}{p(\chi_1)}$                                                   | $\chi_2 \perp \phi, \psi$ given $\chi_1$                                                                                                         | non-pre-proline asparagines          |
| Ile          | All non-pre-proline isoleucines (56,534)    | $\frac{p(\phi, \psi, \chi_1)P(\chi_1, \chi_2)}{p(\chi_1)}$                                                   | $\chi_2 \perp \phi, \psi$ given $\chi_1$                                                                                                         | non-pre-proline isoleucines          |
| Leu          | All non-pre-proline leucines (90,123)       | $\frac{p(\phi, \psi, \chi_1)P(\chi_1, \chi_2)}{p(\chi_1)}$                                                   | $\chi_2 \perp \phi, \psi$ given $\chi_1$                                                                                                         | non-pre-proline leucines             |
| His          | All non-pre-proline histidines (22,619)     | $\frac{p(\phi, \psi, \chi_1)P(\chi_1, \chi_2)}{p(\chi_1)}$                                                   | $\chi_2 \perp \phi, \psi$ given $\chi_1$                                                                                                         | non-pre-proline histidines           |
| Trp          | All non-pre-proline tryptophans (15,110)    | $\frac{p(\phi, \psi, \chi_1)P(\chi_1, \chi_2)}{p(\chi_1)}$                                                   | $\chi_2 \perp \phi, \psi$ given $\chi_1$                                                                                                         | non-pre-proline tryptophans          |
| Tyr          | All non-pre-proline tyrosines (36,671)      | $\frac{p(\phi, \psi, \chi_1)P(\chi_1, \chi_2)}{p(\chi_1)}$                                                   | $\chi_2 \perp \phi, \psi$ given $\chi_1$                                                                                                         | non-pre-proline tyrosines            |
| Phe          | All non-pre-proline phenylalanines (43,564) | $\frac{p(\phi, \psi, \chi_1)P(\chi_1, \chi_2)}{p(\chi_1)}$                                                   | $\chi_2 \perp \phi, \psi$ given $\chi_1$                                                                                                         | non-pre-proline phenylalanines       |
| Met          | All non-pre-proline methionines (13,727)    | $\frac{p(\phi, \psi, \chi_1)P(\chi_1, \chi_2, \chi_3)}{p(\chi_1)}$                                           | $\chi_2 \perp \phi, \psi$ given $\chi_1$<br>$\chi_3 \perp \phi, \psi$ given $\chi_1, \chi_2$                                                     | non-pre-proline methionines          |
| Glu          | All non-pre-proline glutamates (45,332)     | $\frac{p(\phi, \psi, \chi_1)P(\chi_1, \chi_2, \chi_3)}{p(\chi_1)}$                                           | $\chi_2 \perp \phi, \psi$ given $\chi_1$<br>$\chi_3 \perp \phi, \psi$ given $\chi_1, \chi_2$                                                     | non-pre-proline glutamates           |
| Gln          | All non-pre-proline glutamines (30,031)     | $\frac{p(\phi, \psi, \chi_1)P(\chi_1, \chi_2, \chi_3)}{p(\chi_1)}$                                           | $\chi_2 \perp \phi, \psi$ given $\chi_1$<br>$\chi_3 \perp \phi, \psi$ given $\chi_1, \chi_2$                                                     | non-pre-proline glutamines           |
| Arg          | All non-pre-proline arginines (37,112)      | $\frac{p(\phi, \psi, \chi_1)P(\chi_1, \chi_2, \chi_3)P(\chi_2, \chi_3, \chi_4)}{p(\chi_1)P(\chi_2, \chi_3)}$ | $\chi_2 \perp \phi, \psi$ given $\chi_1$<br>$\chi_3 \perp \phi, \psi$ given $\chi_1, \chi_2$<br>$\chi_4 \perp \phi, \psi$ given $\chi_2, \chi_3$ | non-pre-proline arginines            |
| Lys          | All non-pre-proline lysines (35,281)        | $\frac{p(\phi, \psi, \chi_1)P(\chi_1, \chi_2, \chi_3)P(\chi_2, \chi_3, \chi_4)}{p(\chi_1)P(\chi_2, \chi_3)}$ | $\chi_2 \perp \phi, \psi$ given $\chi_1$<br>$\chi_3 \perp \phi, \psi$ given $\chi_1, \chi_2$<br>$\chi_4 \perp \phi, \psi$ given $\chi_2, \chi_3$ | non-pre-proline lysines              |

<sup>a</sup> Residues in the torsion angle database used to estimate the probability density function (the total number of instances is indicated in parenthesis).

<sup>b</sup> Expression used to represent the full joint probability density function. For simplicity, conditionals are omitted (for residue type Gly,  $p(\phi, \psi)$  stands for  $p(\phi, \psi|\text{Gly})$ , etc.). For certain prePro residue subtypes (e.g., prePro<sub>Asp</sub>) the different probability density components arise from different residue populations in the database.

<sup>c</sup> Approximation used to break down the full probability density function into components of lower dimensionality ( $\perp$  means “independent of”).

<sup>d</sup> Residues to which the associated statistical potential is applied during structure calculations.
